# Supplementary material for: Patterning liquids on inkjet-imprinted surfaces with highly adhesive superhydrophobicity
Source: Royal Society of Chemistry journal article supplement (doi:10.1039/c5nr09239f), 2016-01-01
Supplement: c5nr09239f1.pdf [file c5nr09239f1.pdf]

Supporting Information for

# Patterning liquids on inkjet-imprinted surfaces with highly adhesive superhydrophobicity

*Bin Bao, Jiazhen Sun, Meng Gao, Xingye Zhang, Lei Jiang, and Yanlin Song\**

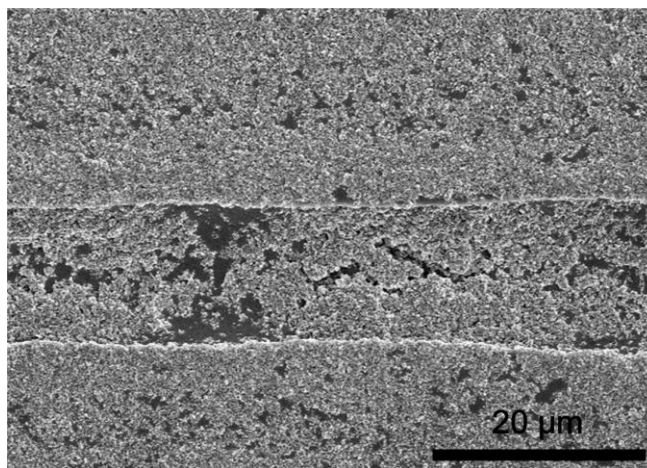

**Figure S1.** SEM image of a single microgroove covered with silica nanoparticles. The silica nanoparticles are uniformly distributed on the protruding surface and inside the microgroove.

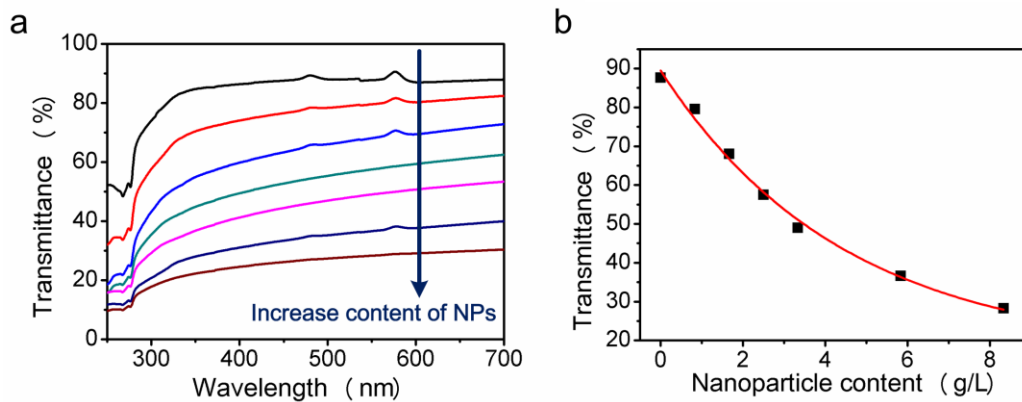

**Figure S2.** Influence of the content of the spin-coated nanoparticle suspensions on the transparency of the inkjet-imprinted PDMS surfaces. (a) Transmittance spectra of the inkjet-imprinted PDMS surfaces with the modification of different contents of silica nanoparticles. (b) The relationship between the transmittance at 550 nm and the nanoparticle content.

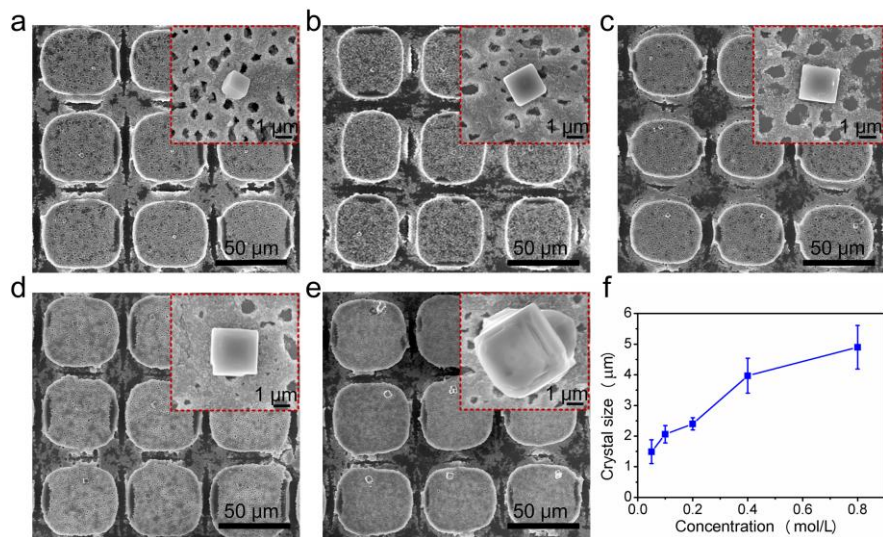

**Figure S3.** Influence of the NaCl solution concentration on the crystal size. The concentrations from (a) to (e) are 0.05 M, 0.1 M, 0.2 M, 0.4 M and 0.8 M, respectively. Insets in (a)-(e) are magnified SEM images of the NaCl single crystals on top of the patterns. (f) Relationship between the average crystal size and the concentration of the NaCl solutions.
